# Supplementary material for: Gata2, Nkx2-2 and Skor2 form a transcription factor network regulating development of a midbrain GABAergic neuron subtype with characteristics of REM-sleep regulatory neurons
Source: Oxford University Press journal article supplement (doi:10.1242/dev.200937), 2022-07-11
Supplement: dev200937supp.pdf [file dev200937supp.pdf]

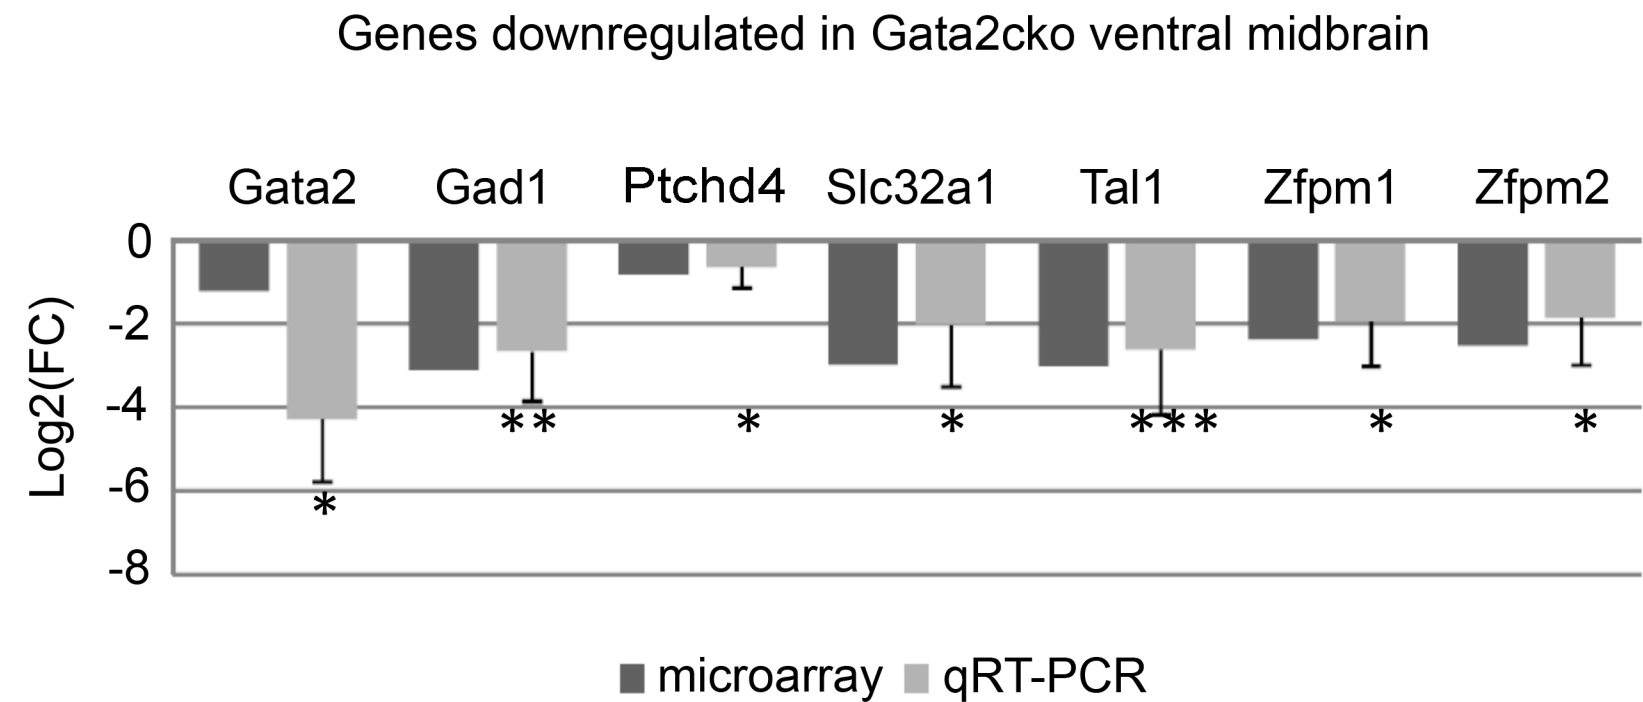

**Fig. S1. Comparison of the fold change indicated by the microarray data analysis and quantitative RT-PCR.** FC, fold change. For a selection of predicted *Gata2*-regulated genes, qRT-PCR assay was performed. After RT-PCR, fold change was calculated using the Ct values detected in the *Gata2*<sup>cko</sup> and control (*En1*<sup>Cre</sup>; *Gata2*<sup>flox/wt</sup>) cDNA. Samples were normalized against *Actb* expression level in the same sample. The qRT-PCR was performed with 4 replicate cDNA samples. The statistical significance of the fold change in normalized expression levels is indicated. \*\*\*  $P < 0.001$ , \*\*  $P < 0.01$ , \*  $P < 0.05$ . The results of the microarray and qRT-PCR are largely consistent. An exception is the *Gata2* gene, where the microarray detects a truncated non-functional transcript.

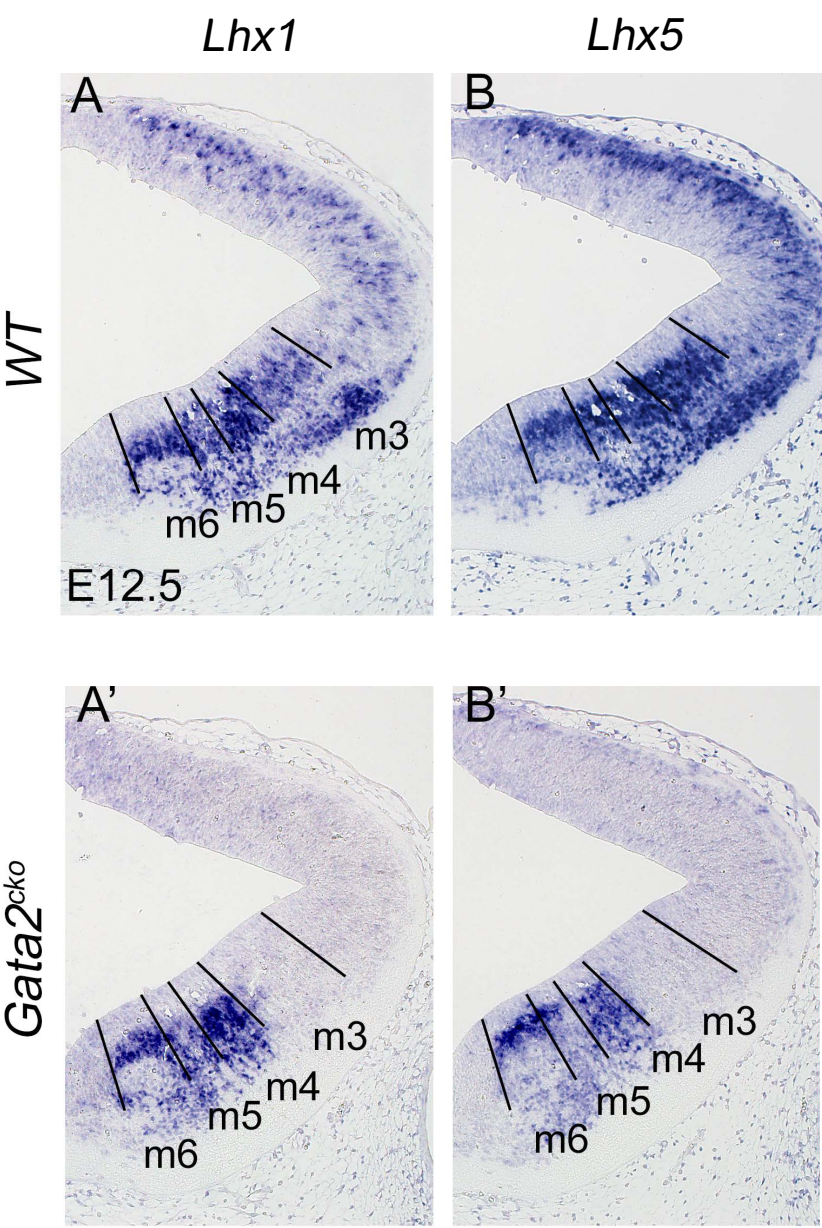

**Fig. S2. ISH analysis.** (A-B') *Lhx1* (A,A') and *Lhx5* (B,B') in wild-type and *Gata2*<sup>cko</sup> mutant embryos at E12.5.

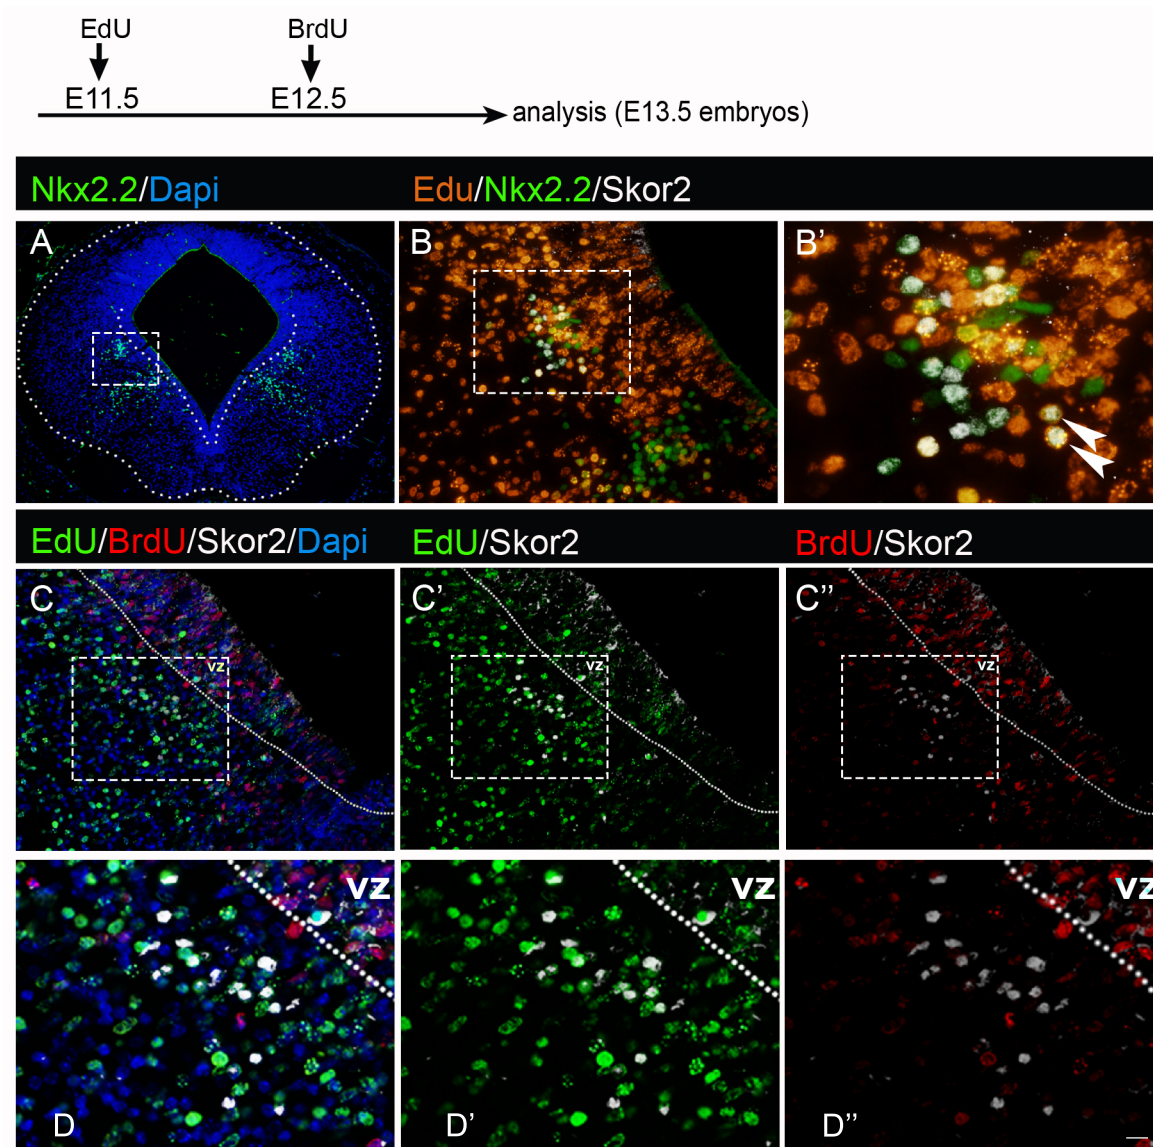

**Fig. S3. *Skor2*<sup>+</sup> neuron birth-dating by BrdU and EdU labelling.**

Pregnant females received one dose of EdU at E11.5 and one dose of BrdU at E12.5 of pregnancy. Embryos were dissected at E13.5 and analyzed for the label.

A, Nkx2-2 IHC on a coronal section of the E13.5 mouse midbrain.

B-B', Coexpression of Nkx2-2, Skor2 and EdU in E13.5 mouse midbrain. B', a close-up of *Skor2*<sup>+</sup> cells (dashed box in B). Arrowheads indicate triple-labelled cells.

C-D'', Labelling for EdU and BrdU in *Skor2*<sup>+</sup> cells. EdU is detected in most of the *Skor2*<sup>+</sup> cells (C'). BrdU is not detected in the *Skor2*<sup>+</sup> cells (C''). Close-ups of indicated regions are shown in D-D''. vz, ventricular zone.

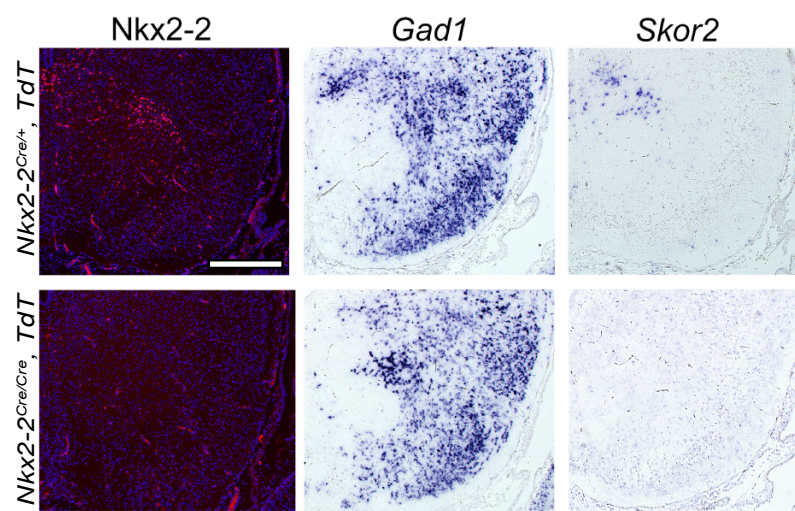

**Fig. S4. *Skor2*, but not *Gad1* expression is lost in the *Nkx2-2* mutant mouse.**

Coronal sections of E18.5 mouse midbrain analysed for the expression of *Nkx2-2* (IHC), *Gad1* and *Skor2* (ISH), in *Ctrl* (*Nkx2-2*<sup>Cre/wt</sup>, *TdT*) and *Nkx2-2*<sup>null</sup> mutant (*Nkx2-2*<sup>Cre/Cre</sup>, *TdT*) mice. Scale bar: 200  $\mu$ m.



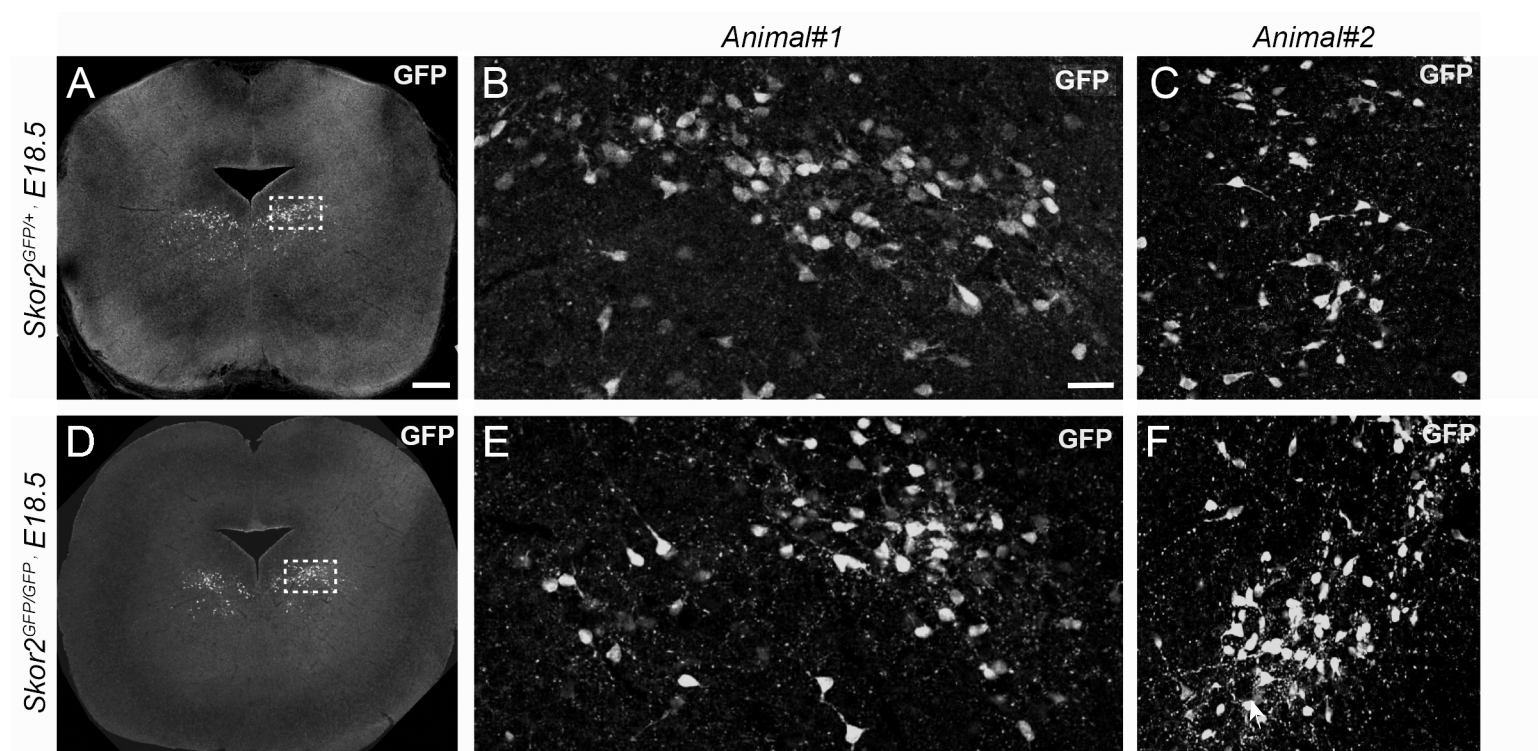

**Fig. S5. Normal appearance of neurons expressing the *Skor2* gene is in mice homozygous for a *Skor2* null allele.** GFP expression (IHC) on coronal sections of E18.5 *Skor2*<sup>GFP/+</sup> (A-C) and *Skor2*<sup>GFP/GFP</sup> midbrain (D-F). The position and number of cells as well as the number and appearance of neurites look similar between the genotypes. Arrowheads point to neuronal projections. Scale bar: 200  $\mu$ m (A,D), 50  $\mu$ m (B,C,E,F).

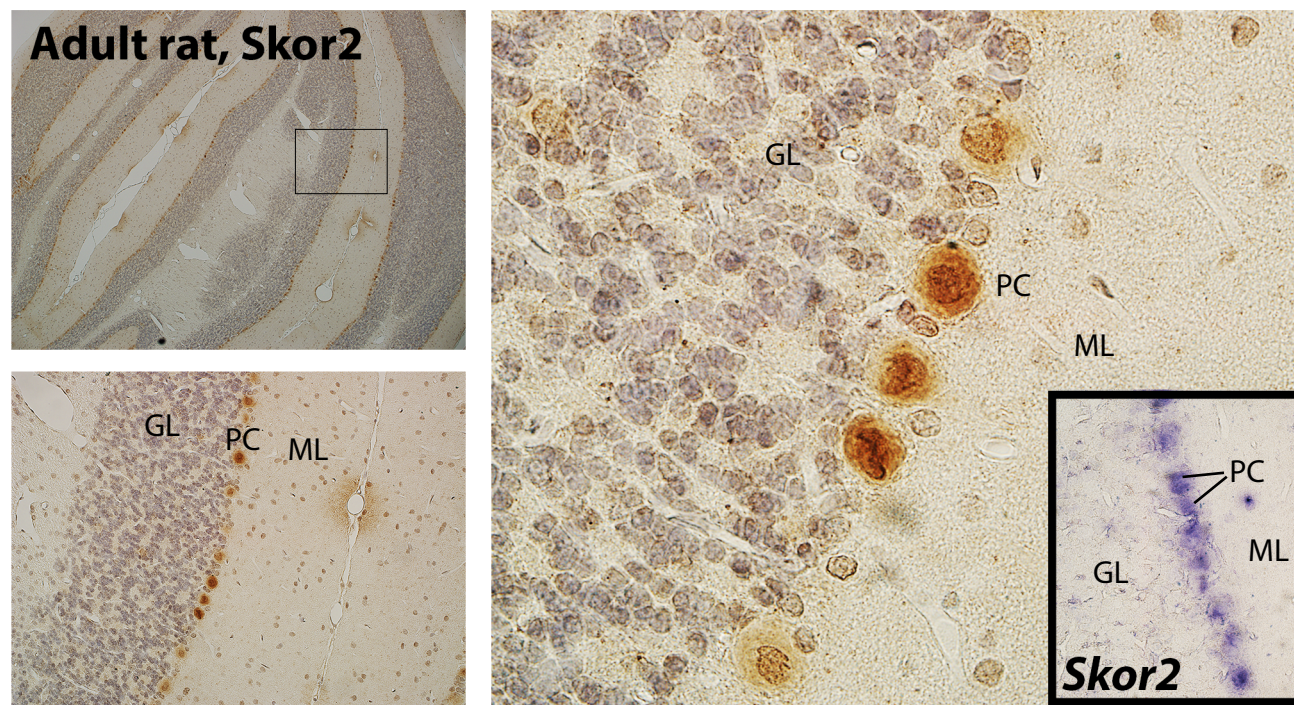

**Fig. S6. Skor2 expression in the adult rat cerebellum.** IHC and ISH on coronal sections. Skor2 protein was detected in the Purkinje cells (PC) in the rat cerebellum (orange, IHC). The inset shows *Skor2* mRNA expression in the Purkinje cells (violet, ISH). ML, molecular layer; GC, granular layer.

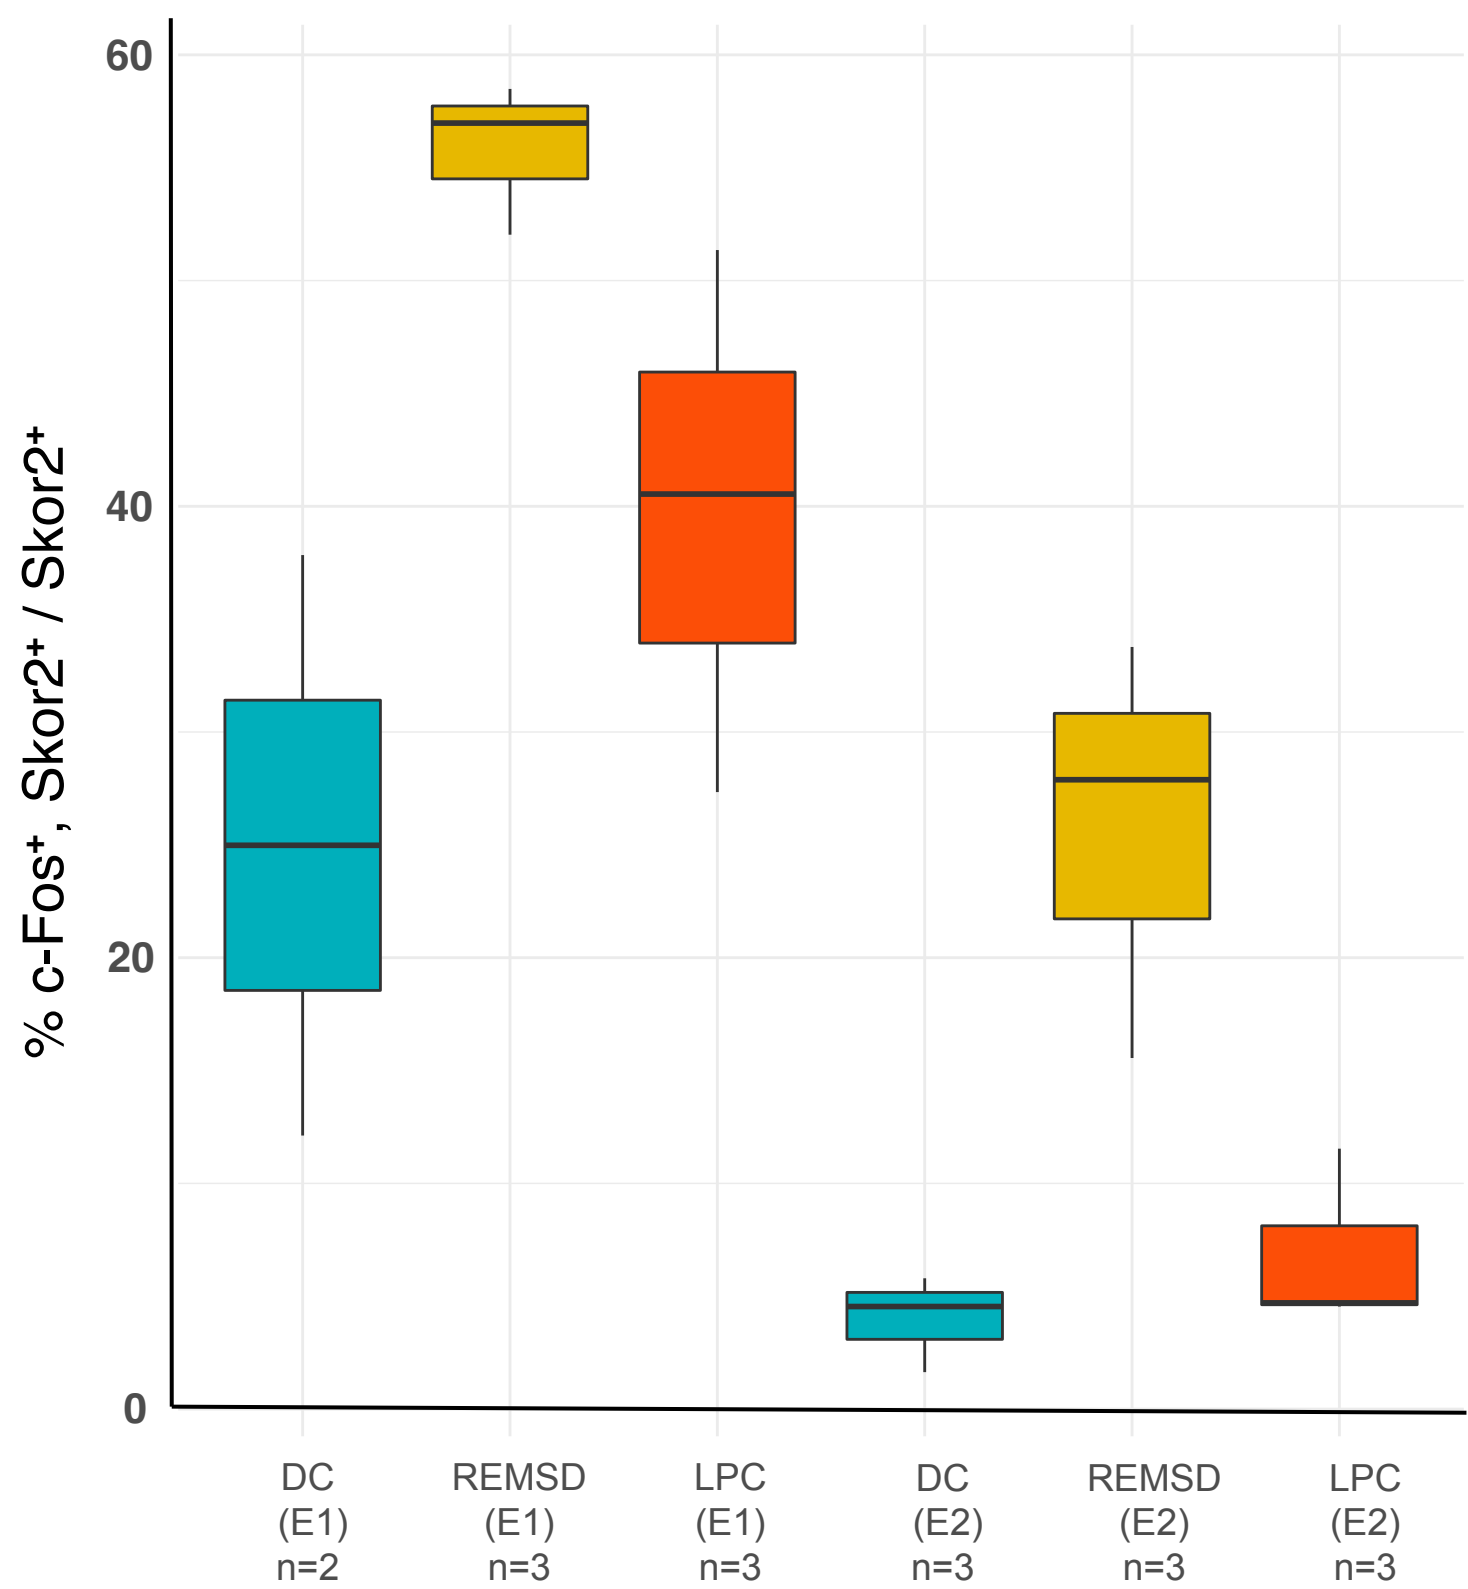

**Fig. S7. c-Fos staining efficiency in REM sleep deprivation experiments, before normalisation.** Data is presented as percent of c-Fos-positive cells from the dMRF/vIPAG *Skor2*<sup>+</sup> cells. Experiment groups (DC, REMSD, LPC) and experiment number (E1, E2) is indicated. Due to staining efficiency or other technical variation, the proportion of c-Fos labelled cells differs between the individual experiments (E1 and E2). The difference is systematic, as the experiment groups (DC, REMSD, LPC) show the same trend in labelled cell proportion. The number of animals (n) in each experiment and treatment group is indicated.

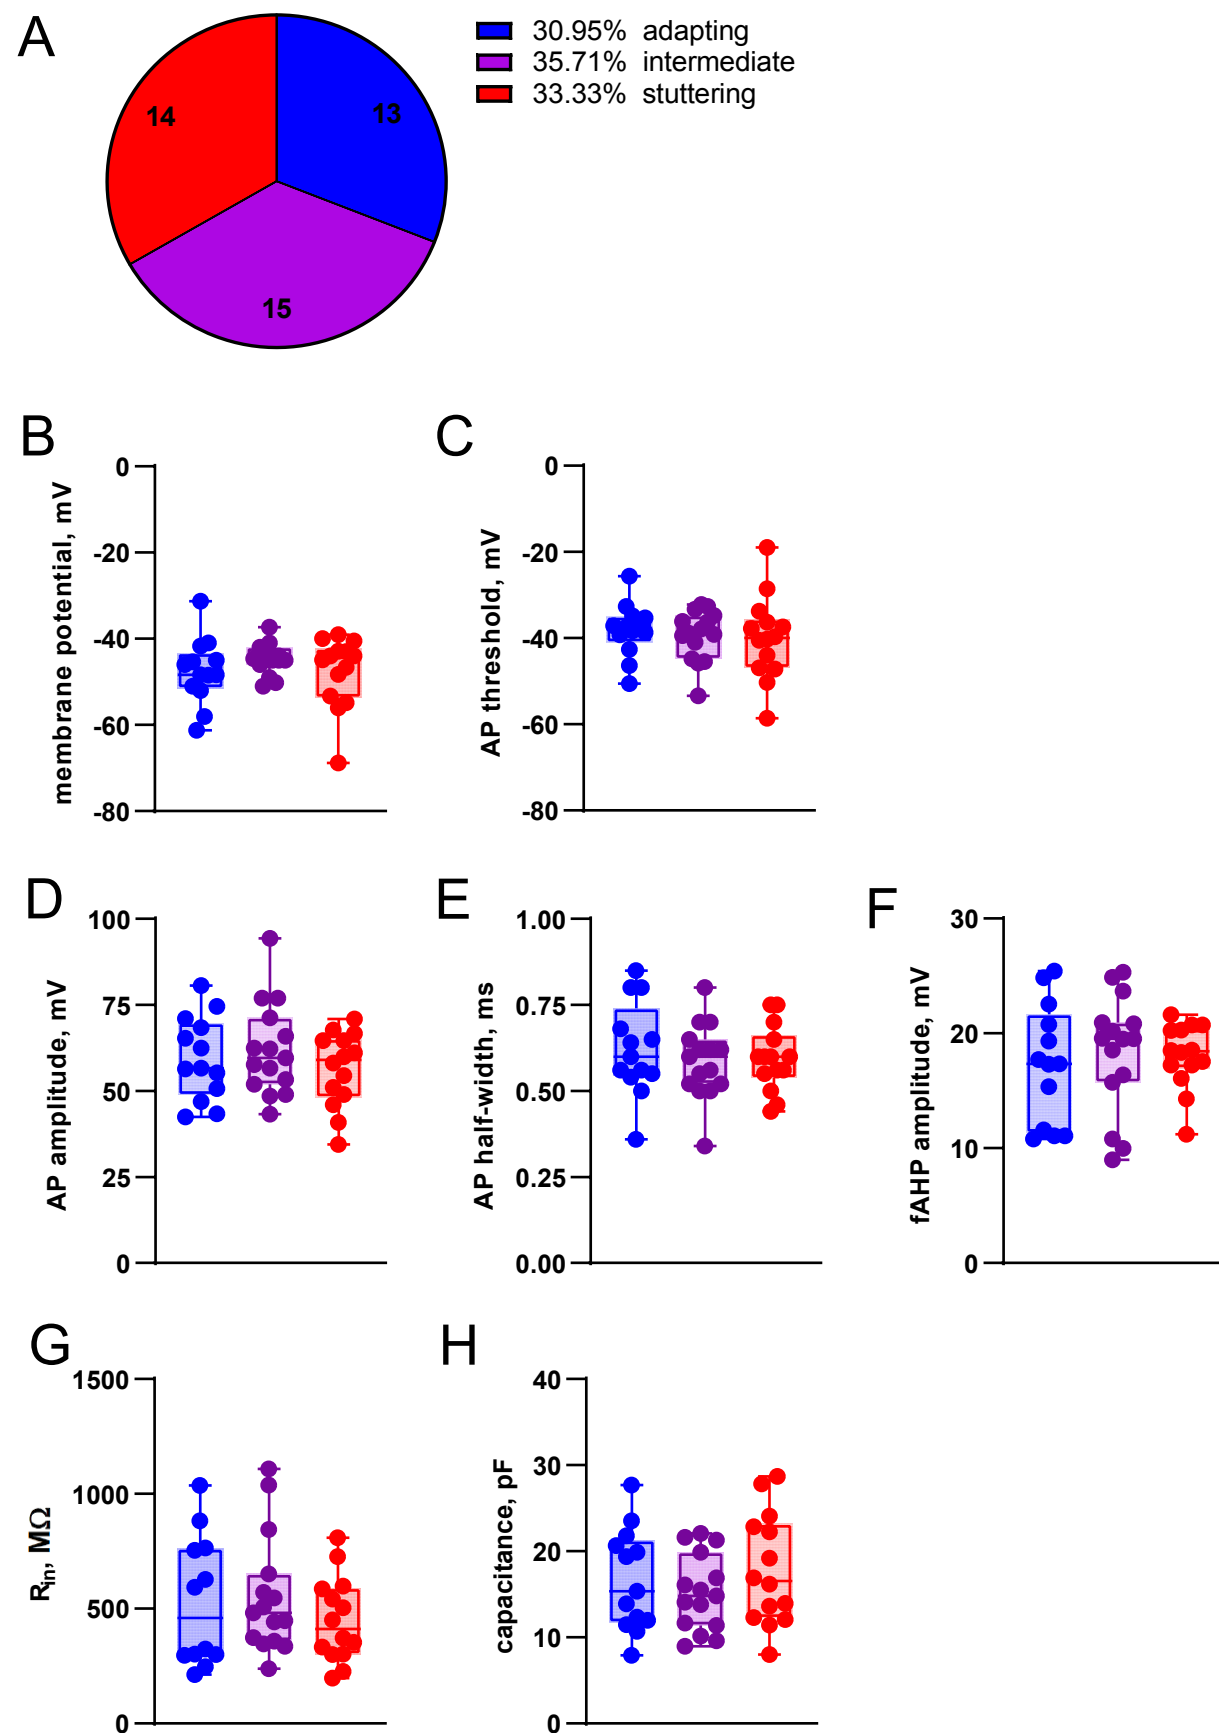

**Fig. S8. Classification of the *Skor2*<sup>+</sup> neurons by the firing patterns.** A, The proportion of cells by the assigned firing pattern class. B-H, Comparison of the excitability parameters measured in adapting, intermediate and stuttering GFP<sup>+</sup> neurons in the *Skor2*<sup>GFP/+</sup> mouse midbrain by electrophysiology. Boxplots show median, 25 and 75 percentiles with whiskers showing minimum and maximum values. RMP, resting membrane potential; AP, action potential; mAHP and fAHP, medium and fast after-hyperpolarizing potential;  $R_{in}$ , input resistance.



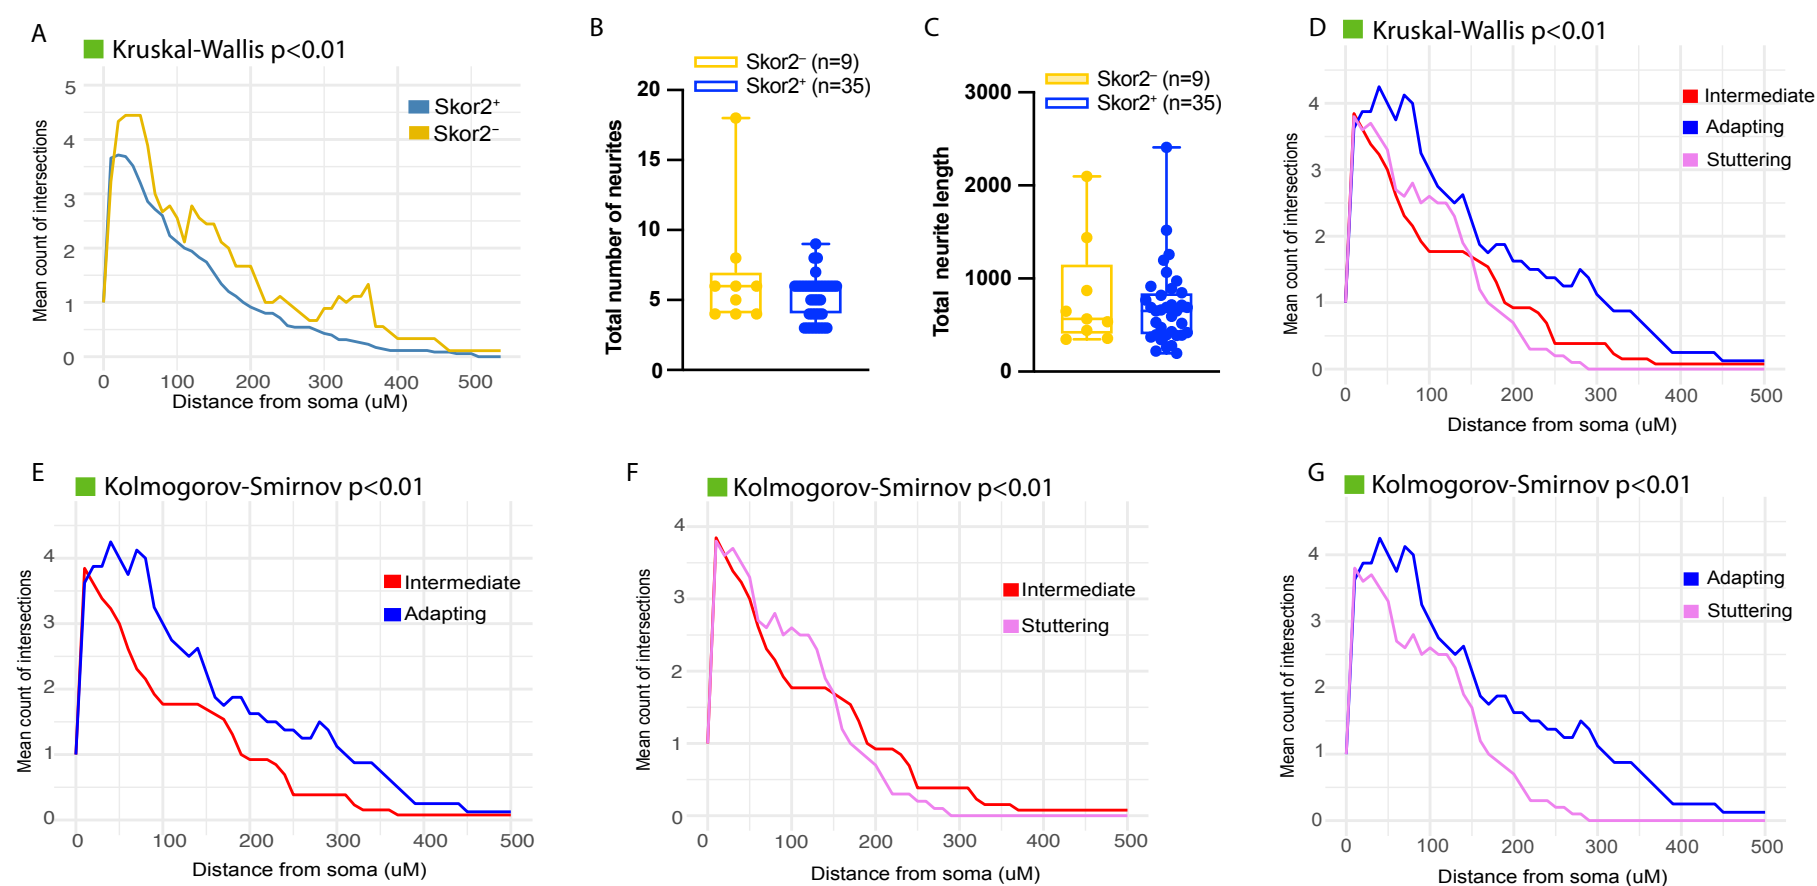

**Fig. S9. Comparison of morphological measurements of the *Skor2*<sup>+</sup> and *Skor2*<sup>-</sup> neurons and the *Skor2*<sup>+</sup> neuron subclasses**

A, Average number of the intersections (+/- SEM) in Sholl analysis of GFP<sup>+</sup> (*Skor2*<sup>+</sup>, n= 35) and GFP<sup>-</sup> (*Skor2*<sup>-</sup>, n= 9) cells in the *Skor2*<sup>GFP/+</sup> mouse midbrain. The distance intervals where significant change (Kruskal-Wallis test  $p < 0.01$ ) in the number of intersections was observed is highlighted in green. Calculations were conducted with moving window of 50  $\mu$ m.

B-C, Comparison of the neurite number (B) and length in pixels (C) between the GFP<sup>+</sup> (*Skor2*<sup>+</sup>, n= 35) and GFP<sup>-</sup> (*Skor2*<sup>-</sup>, n= 9) cells.

D-G, Average number of the intersections (+/- SEM) in Sholl analysis of GFP<sup>+</sup> neuron subclasses. The comparative analysis of all three cell classes (D), as well as the pairwise comparisons are shown. The distance intervals where significant change in the number of intersections was observed is highlighted in green. Kruskal-Wallis test of multiple comparisons was used in the comparison of three groups, Kolmogorov-Smirnov test for the pairwise comparison. Significance threshold in both tests was  $p < 0.01$ . Calculations were conducted with moving window of 50  $\mu$ m.

**Table S1.** Downregulated genes in the E12.5 *Gata2<sup>cko</sup>* midbrain.

[Click here to download Table S1](#)

**Table S2.** Complete list of down- and upregulated genes in E12.5 *Gata2<sup>cko</sup>* dorsal and ventral midbrain, identified in the microarray data analyses.

[Click here to download Table S2](#)

**Table S3.** The gene ontology (GO) terms enriched among the genes downregulated in the *Gata2<sup>cko</sup>* midbrain. DAVID (<https://david.ncifcrf.gov/>) was used for the enrichment analysis.

[Click here to download Table S3](#)

**Table S4.** The group identity, experiment ID, number of *Skor2<sup>+</sup>* cells, number of c-Fos<sup>+</sup> cells, the percent of c-Fos labelled *Skor2<sup>+</sup>* cells and the transformed z-scores for each animal in the REM sleep deprivation assay.

[Click here to download Table S4](#)

Table S5. Antibodies and mRNA ISH probes used in the study.

| Primary antibodies   |                          |                |                       |                       |
|----------------------|--------------------------|----------------|-----------------------|-----------------------|
| Target protein       | Supplier                 | Catalog number | Produced in (species) | Working concentration |
| TH                   | Millipore                | MAB318         | mouse                 | 1:500                 |
| Ctb                  | List biological Lab.Inc. | 703            | goat                  | 1:1000                |
| GFP                  | Abcam                    | ab13970        | chicken               | 1:1000                |
| GFP                  | Abcam                    | ab290          | rabbit                | 1:500                 |
| Neurofilament        | DSHB                     | 2H3            | mouse                 | 1:500                 |
| FoxP1                | Abcam                    | ab16645        | rabbit                | 1:400                 |
| Nkx2-2               | DSHB                     | 74.5A5         | mouse                 | 1:200                 |
| Orexin r1 (HCRTR1)   | Alomone labs             | AOR-001        | rabbit                | 1:100                 |
| Orexin r2 (HCRTR2)   | Alomone labs             | AOR-002        | rabbit                | 1:100                 |
| Skor2                | Atlas antibodies         | HPA046206      | rabbit                | 1:400                 |
| Pou4f1(Brn3a)        | Santa Cruz Biotechnology | sc-8429        | mouse                 | 1:200                 |
| RFP                  | Rockland                 | 600-401-379    | rabbit                | 1:500                 |
| c-Fos (FosB)         | Abcam                    | ab11959        | mouse                 | 1:500                 |
|                      |                          |                |                       |                       |
| Secondary antibodies |                          |                |                       |                       |
| rabbit IgG 488       | Thermo fisher scientific | A21206         | donkey                | 1:400                 |
| rabbit IgG 568       | Thermo fisher scientific | A21202         | donkey                | 1:400                 |
| goat IgG 568         | Thermo fisher scientific | A11057         | donkey                | 1:400                 |
| mouse IgG 568        | Thermo fisher scientific | A32744         | donkey                | 1:400                 |
| mouse IgG 647        | Thermo fisher scientific | A31571         | donkey                | 1:400                 |
| rabbit IgG 647       | Thermo fisher scientific | A31573         | donkey                | 1:400                 |
| chicken IgG 488      | Thermo fisher scientific | A32931         | goat                  | 1:400                 |

| mRNA probes |                        |                              |
|-------------|------------------------|------------------------------|
| Target gene | Source                 | Clone number (if applicable) |
| Gad1        | RZPD                   | IRAVp968CM67D6               |
| Gata2       | Lilleväli et al., 2004 | n/a                          |

|                  |                           |                    |
|------------------|---------------------------|--------------------|
| Gata3            | Lilleväli et al., 2004    | n/a                |
| Lhx5             | Source Bioscience         | IMAGE ID 6830059   |
| Nkx2-2           | RZPD                      | IMAGE clone 480100 |
| Six3             | Source Bioscience         | IMAGp998B1912702Q  |
| mouse Skor2      | Source Bioscience         | IMAGE ID 6853809   |
| Slc17a6 (Vglut2) | Guimera et al., 2006      | n/a                |
| Sox14            | Source Bioscience         | IMAGp998A2414391Q  |
| Tal1             | Source Bioscience         | IRAVp968D09118D    |
| Tal2             | RZPD                      | IRCLp5011D0623D    |
| Zfpm1            | Source Bioscience         | IMAGE ID 3585094   |
| Zfpm2            | Source Bioscience         | IRAVp968B06115D    |
| rat Skor2        | see Materials and Methods | n/a                |
